# Supplementary material
Source: PubMed Central journal article supplement (PMC4380260)

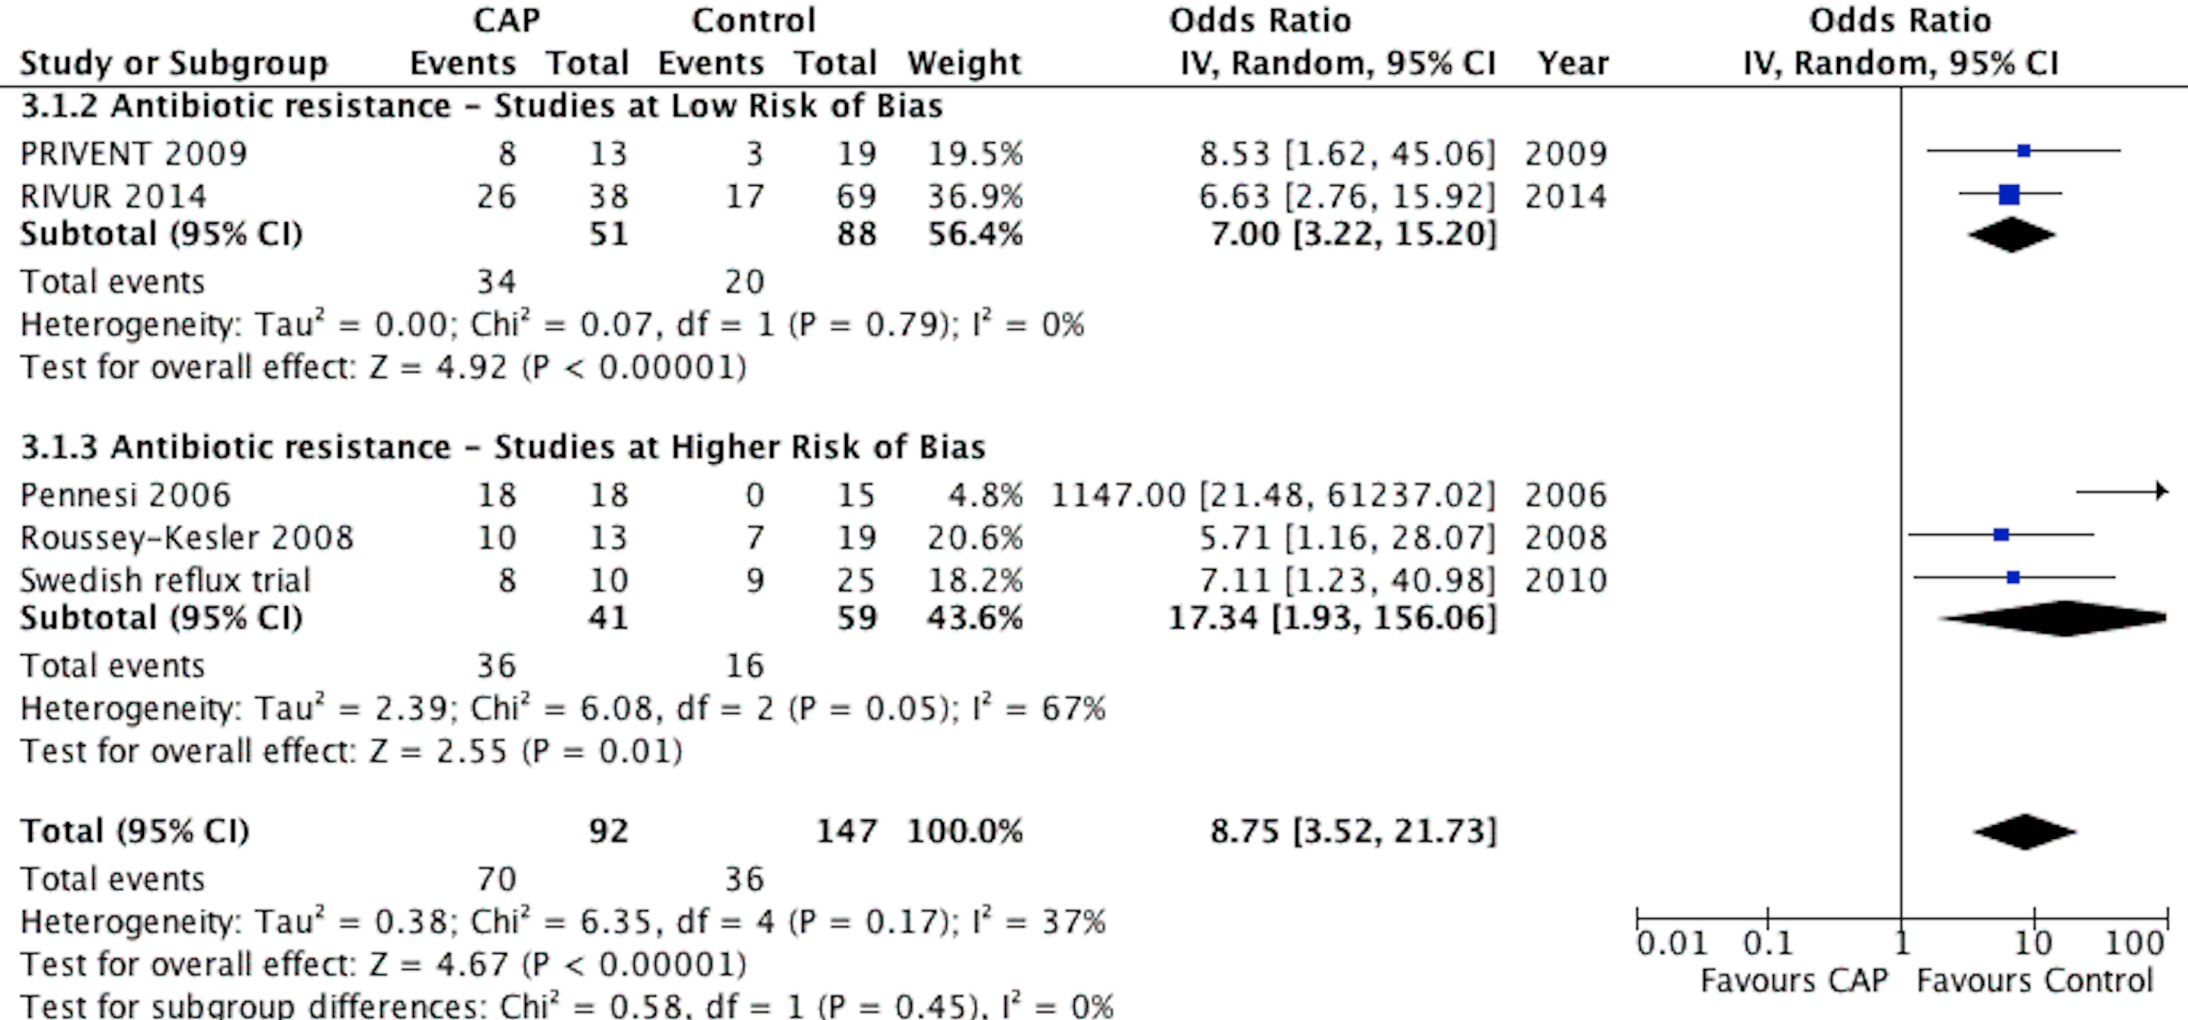

Supplement: NIHMS667301-supplement-Supplementary_Figure_4b.pdf [file NIHMS667301-supplement-Supplementary_Figure_4b.pdf]

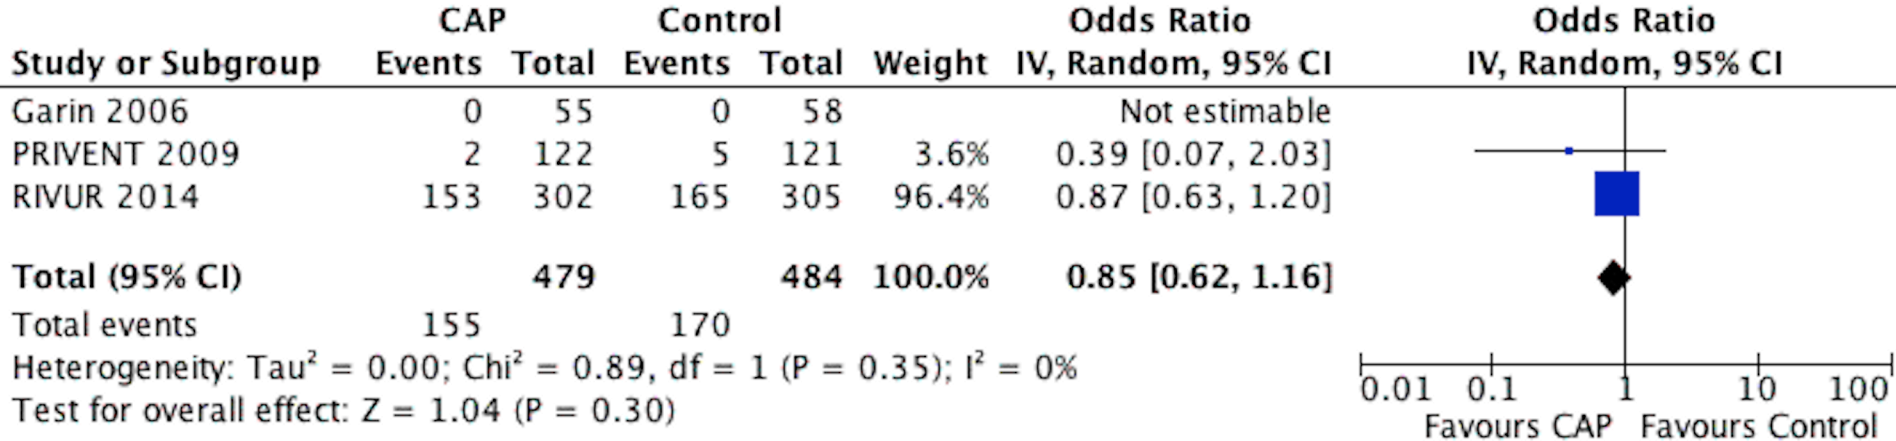

Supplement: NIHMS667301-supplement-Supplementary_Figure_4c.pdf [file NIHMS667301-supplement-Supplementary_Figure_4c.pdf]
